# Supplementary material for: IL-10 constrains sphingolipid metabolism to limit inflammation
Source: PubMed Central journal article supplement (PMC10954550; doi:10.1038/s41586-024-07098-5), 2024-02-21
Supplement: 41586_2024_7098_MOESM1_ESM.pdf [file 41586_2024_7098_MOESM1_ESM.pdf]

**Supplementary information**

---

**IL-10 constrains sphingolipid metabolism to limit inflammation**

---

In the format provided by the authors and unedited

# IL-10 constrains sphingolipid metabolism to limit inflammation

## Supplemental Information Guide:

Figure 1: Example flow cytometry gating for immune cell populations purified from colons of chimeric mice.....p1

Figure 2: Example flow cytometry gating for immune cell populations purified from murine colons.....p2

# Supplemental Information: Figure 1:

**A.**

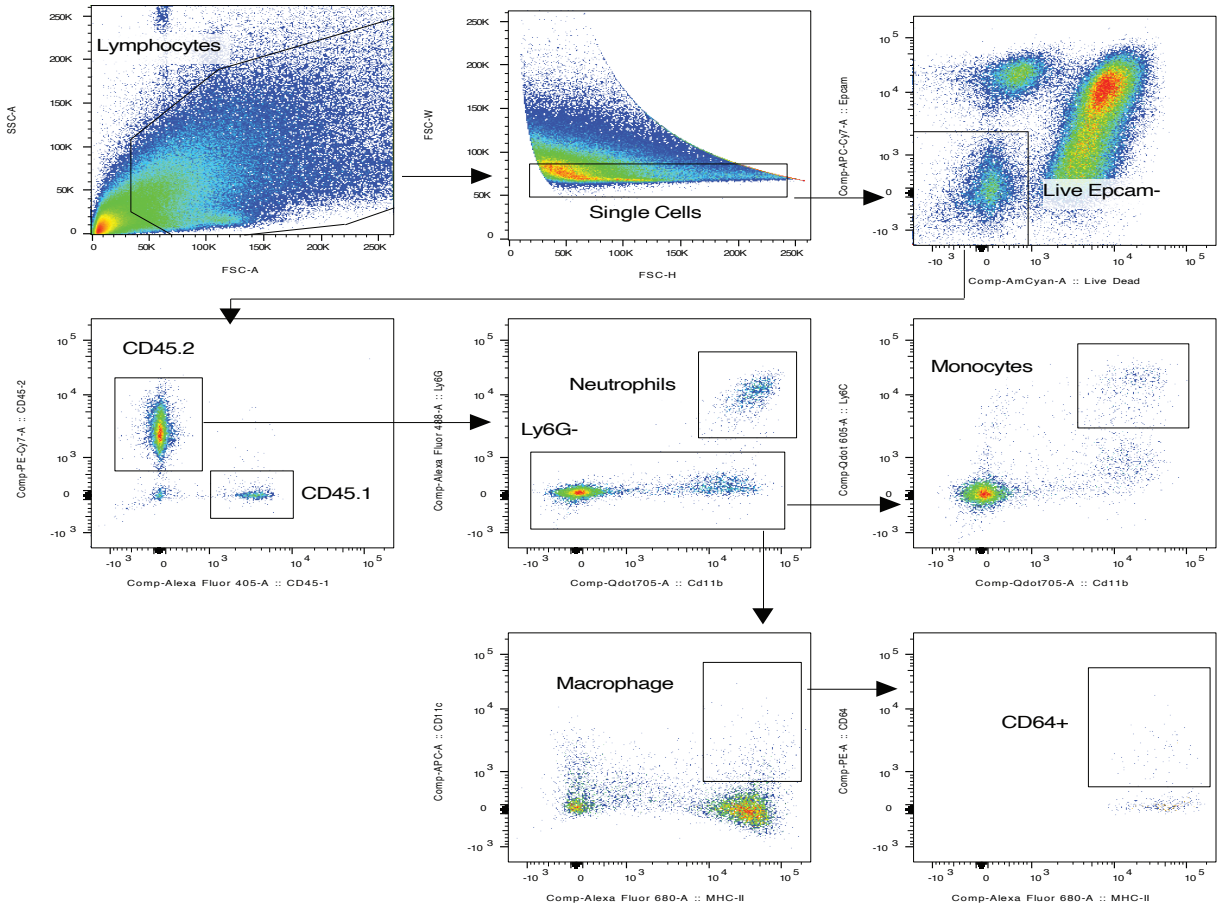

**B.**

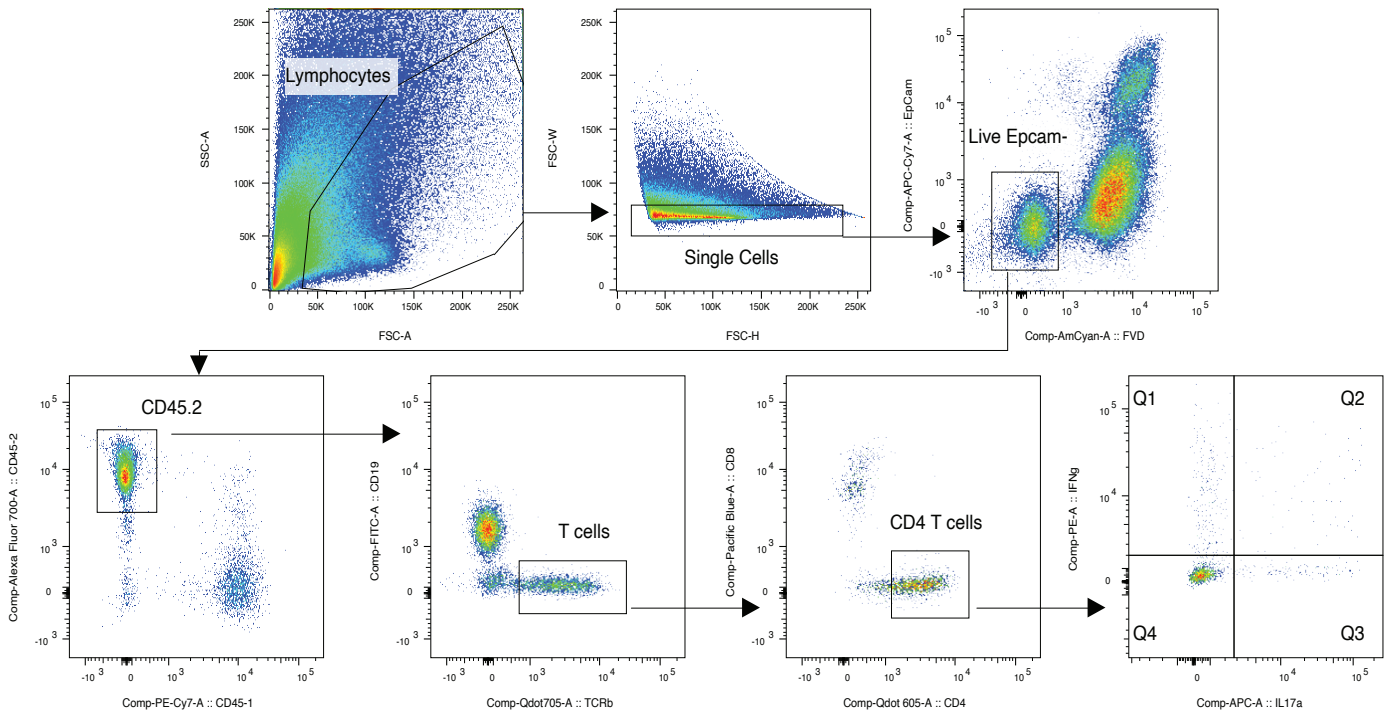

**Figure 1:** Example flow cytometry gates for A) myeloid and B) Lymphoid immune cell populations purified from colons of chimeric mice

Supplemental Information: **Figure 2:**

**A.**

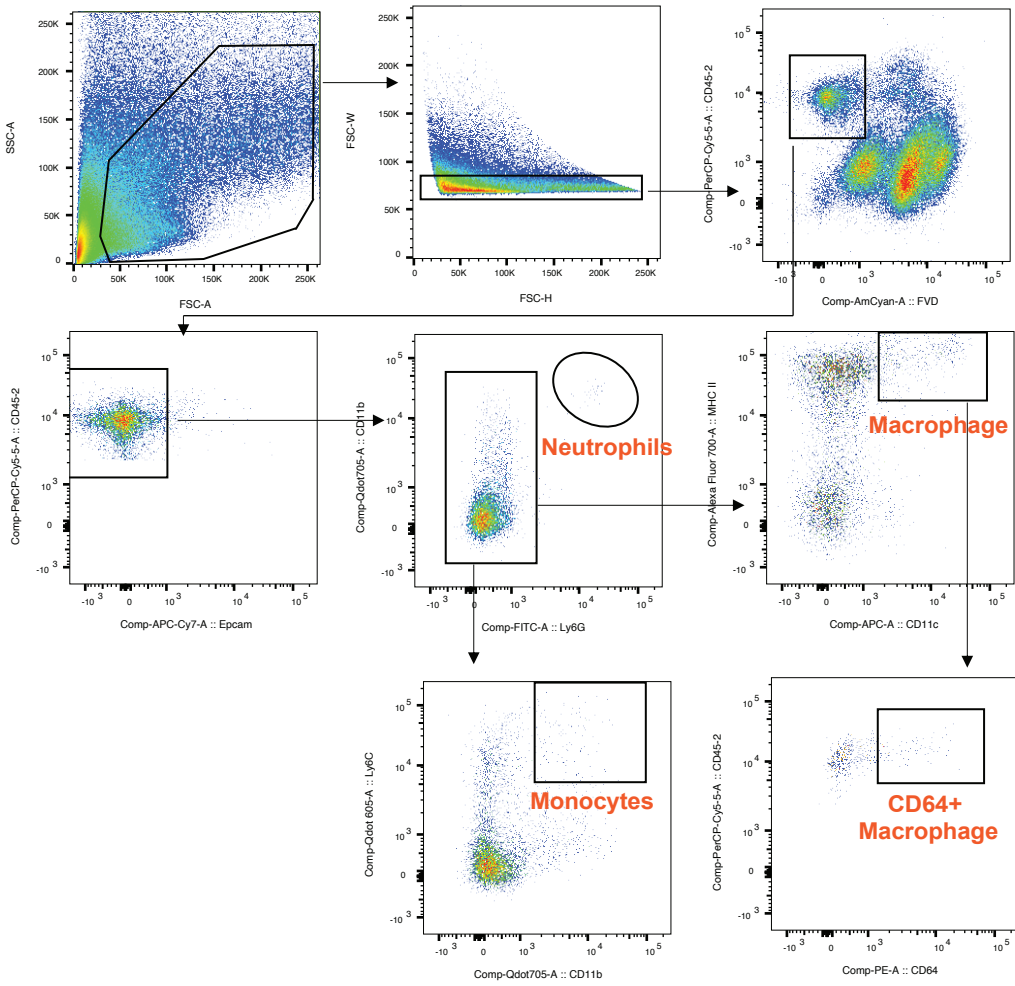

**B.**

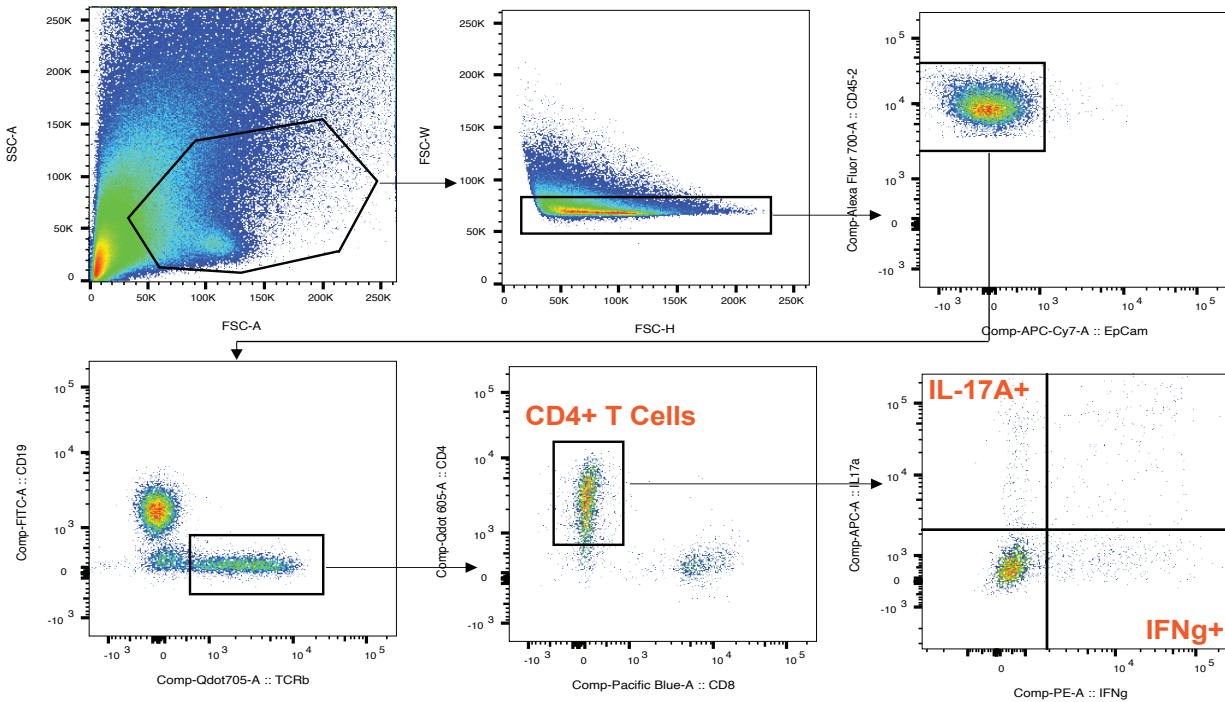

**Figure 2:** Example flow cytometry gates for A) myeloid and B) Lymphoid immune cell populations purified from murine colons
